# Supplementary material
Source: HighWire-hosted journal article supplement (http://www.cfp.ca/highwire/filestream/32340/field_highwire_adjunct_files/0/619_Log_sheet.pdf)
Supplement: 619_Log_sheet.pdf [file 619_Log_sheet.pdf]

**Figure 1:**

**C.U.R.E. Survey: Consult Response Time Log Sheet      Physician: \_\_\_\_\_**

| <b>Pt<br/>initials</b> | <b>Specialty</b> | <b>Referring Diagnosis/<br/>Chief complaint</b> | <b>Doctor-<br/>doctor phone<br/>call?<br/>(Yes, No)</b> | <b>Pt sent to ED<br/>after call?<br/>(Yes, No)</b> | <b>Date Request Sent</b> | <b>Date Reply<br/>Received</b> | <b>Date Pt<br/>Appointment</b> |
|------------------------|------------------|-------------------------------------------------|---------------------------------------------------------|----------------------------------------------------|--------------------------|--------------------------------|--------------------------------|
|                        |                  |                                                 |                                                         |                                                    |                          |                                |                                |
|                        |                  |                                                 |                                                         |                                                    |                          |                                |                                |
|                        |                  |                                                 |                                                         |                                                    |                          |                                |                                |
|                        |                  |                                                 |                                                         |                                                    |                          |                                |                                |
|                        |                  |                                                 |                                                         |                                                    |                          |                                |                                |
|                        |                  |                                                 |                                                         |                                                    |                          |                                |                                |
|                        |                  |                                                 |                                                         |                                                    |                          |                                |                                |

**FAX completed sheets to CURE office. NOTE: Please remove PT initials before faxing**
